# Supplementary material for: Perceived stress and smoking across 41 countries: A global perspective across Europe, Africa, Asia and the Americas
Source: PubMed Central journal article supplement (PMC5548752; doi:10.1038/s41598-017-07579-w), 2017-08-08
Supplement: 41598_2017_7579_MOESM1_ESM.pdf [file 41598_2017_7579_MOESM1_ESM.pdf]

**Perceived stress and smoking across 41 countries: A global perspective across Europe, Africa, Asia  
and the Americas**

*Running title: stress and smoking*

Submission to Scientific Reports

Brendon Stubbs PhD<sup>1-3\*^</sup>, Nicola Veronese MD<sup>4^</sup>, Davy Vancampfort PhD<sup>5-6</sup>, A. Mathew Prina PhD<sup>2</sup>,  
Pao-Yen Lin MD<sup>7-8</sup>, Ping-Tao Tseng MD<sup>9</sup>, Evangelos Evangelou MD<sup>10</sup>, Marco Solmi MD<sup>4, 11-12</sup>, Cristiano  
Kohler PhD<sup>13</sup>, André F. Carvalho MD<sup>4, 13</sup>, Ai Koyanagi MD<sup>14-15</sup>

^ = Joint first authors

1. Physiotherapy Department, South London and Maudsley NHS Foundation Trust, Denmark Hill, London SE5 8AZ, United Kingdom
2. Health Service and Population Research Department, Institute of Psychiatry, Psychology and Neuroscience, King's College London, De Crespigny Park, London, Box SE5 8AF, United Kingdom
3. Department of Psychosis studies, Institute of Psychiatry, Psychology and Neuroscience, King's College London, De Crespigny Park, London, Box SE5 8AF, United Kingdom
4. Institute for Clinical Research and Education in Medicine, I.R.E.M., Padova, Italy
5. KU Leuven Department of Rehabilitation Sciences, Leuven, Belgium
6. KU Leuven, University Psychiatric Center KU Leuven, Leuven-Kortenberg, Belgium
7. Department of Psychiatry, Kaohsiung Chang Gung Memorial Hospital and Chang Gung University College of Medicine, Kaohsiung, Taiwan
8. Institute for Translational Research in Biomedical Sciences, Kaohsiung Chang Gung Memorial Hospital
9. Department of Psychiatry, Tsyu-Huey Mental Hospital, Kaohsiung Jen-Ai's Home, Taiwan
10. Department of Hygiene and Epidemiology, University of Ioannina Medical School, Ioannina, Greece; Department of Biostatistics and Epidemiology, Imperial College London, London, UK
11. Department of Neurosciences, University of Padova, Padova, Italy
12. Local Health Unit 17 ULSS 17, Mental Health Department, Padova, Italy

13. Department of Clinical Medicine and Translational Psychiatry Research Group, Faculty of Medicine, Federal University of Ceará, Fortaleza, CE, Brazil.
14. Research and Development Unit, Parc Sanitari Sant Joan de Déu, Universitat de Barcelona, Fundació Sant Joan de Déu, Dr. Antoni Pujadas, 42, Sant Boi de Llobregat, Barcelona 08830, Spain
15. Instituto de Salud Carlos III, Centro de Investigación Biomédica en Red de Salud Mental, CIBERSAM, Monforte de Lemos 3-5 Pabellón 11, Madrid 28029, Spain

\* **Corresponding Author:** Brendon Stubbs PhD, Head, Physiotherapy Department, South London and Maudsley NHS Foundation Trust, Denmark Hill, London, United Kingdom. Tel: 0044 208 3003100, fax 00442032282702 email: [brendon.stubbs@kcl.ac.uk](mailto:brendon.stubbs@kcl.ac.uk)

## Appendix 1 of ethical approval committees for the World health survey

### Ethical approval

Ethical approval was obtained from each of the following committees in the respective countries for the World Health Survey:

| Country            | Ethical committee approving the study                         |
|--------------------|---------------------------------------------------------------|
| Bangladesh         | Mitra and Associates                                          |
| Bosnia Herzegovina | The Federal Public Health Institute                           |
| Brazil             | Fundacao Oswaldo Cruz                                         |
| Burkina Faso       | Institut de Recherche en Sciences de la Santé                 |
| Chad               | Faculté des Sciences de la Santé, Univ N'Djamena              |
| China              | Centre for Health Statistics Information                      |
| Comoros            | Bureau Comorien de Conseil                                    |
| Congo              | Unité de recherche sur les systèmes de santé                  |
| Ivory Coast        | Ministère de la Santé                                         |
| Croatia            | The Croatian National Institute of Public Health              |
| Czech Republic     | Institute of Health Information and Statistics                |
| Dominican Republic | Centro de Estudios Sociales y Demográficos (CESDEM)           |
| Ecuador            | Fundación Ecuatoriana para la Salud y el Desarrollo (FESALUD) |
| Estonia            | Saar Poll Ltd.                                                |
| Ethiopia           | Department of Community Health, Jimma University              |
| Georgia            | Georgian State Medical Academy (GSMA)                         |
| Ghana              | Department of Community Health, Ghana Medical Sch             |
| Hungary            | Johan Bela National Centre for Epidemiology                   |
| India              | International Institute of Population Sciences                |
| Kazakhstan         | Kazakhstan School of Public Health (KSPH)                     |
| Kenya              | Central Bureau of Statistics                                  |
| Laos               | National Institute of Public Health, Ministry of Health       |
| Latvia             | The Health Promotion Center                                   |
| Malawi             | Centre for Social Research (CSR)                              |
| Malaysia           | Public Health Institute, Ministry of Health                   |
| Mali               | Cellule de Planification et de Statistique, (CPS)             |
| Mauritania         | Office Nationale de la Statistique (ONS)                      |
| Mauritius          | Mauritius Institute of Health                                 |
| Mexico             | Instituto Nacional de Salud Pública                           |
| Morocco            | Ministère de la Santé                                         |
| Myanmar            | Department of Medical Research, Ministry of Health            |
| Namibia            | Ministry of Health                                            |
| Nepal              | ORG-MARG Nepal PVT.Ltd                                        |
| Pakistan           | Ministry of Health                                            |
| Paraguay           | Fac.de Ciencias Veterinarias, Univ. Nacional/DGEEC            |
| Philippines        | College of Medicine, University of the Philippines            |
| Russia             | Semashko Institute for Research on Social Hygiene,            |
| Senegal            | Direction Etudes, Recherche et Formation (DERF)               |
| Slovakia           | Environment,s.c., Centre of Biostatistics and Envi            |
| South Africa       | Community Agency for Social Enquiry (CASE)                    |
| Sri Lanka          | Ministry of Health                                            |
| Swaziland          | Faculty of Health Sciences, Univ Swaziland                    |
| Tunisia            | Institut National de la Santé Publique                        |
| Ukraine            | Odessa State Medical University                               |
| Uruguay            | Centro de Estudios de Economia y Salud (CEES)                 |
| Vietnam            | Ministry of Health                                            |
| Zambia             | School of Humanities & Social Sciences, University of Zambia  |
| Zimbabwe           | Community Health, University of Zimbabwe                      |

**Appendix 2** Sample size by country

---

|                    |        |                        |
|--------------------|--------|------------------------|
| <b>Africa</b>      | N      | <b>Asia</b>            |
| Burkina Faso       | 4,948  | Bangladesh             |
| Chad               | 4,870  | China                  |
| Comoros            | 1,836  | India                  |
| Ethiopia           | 5,089  | Kazakhstan             |
| Ghana              | 4,165  | Laos                   |
| Ivory Coast        | 3,251  | Malaysia               |
| Kenya              | 4,640  | Myanmar                |
| Malawi             | 5,551  | Nepal                  |
| Mauritania         | 3,902  | Pakistan               |
| Mauritius          | 3,968  | Philippines            |
| Morocco            | 5,000  | Sri Lanka              |
| Namibia            | 4,379  | United Arab Emirates   |
| Senegal            | 3,461  | Vietnam                |
| South Africa       | 2,629  |                        |
| Tunisia            | 5,202  | <b>Europe</b>          |
| Zambia             | 4,165  | Bosnia and Herzegovina |
|                    |        | Croatia                |
| <b>Americas</b>    | N      | Czech Republic         |
| Dominican Republic | 5,027  | Estonia                |
| Mexico             | 38,746 | Latvia                 |
| Paraguay           | 5,288  | Russia                 |
| Uruguay            | 2,996  | Spain                  |
|                    |        | Ukraine                |

---

**Appendix 3** Association between perceived stress and smoking (outcome) by country-income level estimated by multivariable logistic regression

|                                     | Low-income countries |             |         | Middle-income countries |             |         |
|-------------------------------------|----------------------|-------------|---------|-------------------------|-------------|---------|
|                                     | OR                   | 95%CI       | P-value | OR                      | 95%CI       | P-value |
| <b>Perceived stress<sup>a</sup></b> | 1.06                 | (1.04-1.08) | <0.0001 | 1.02                    | (1.00-1.04) | 0.0130  |
| <b>Age (years)</b>                  |                      |             |         |                         |             |         |
| 18-34                               | 1.00                 |             |         | 1.00                    |             |         |
| 35-59                               | 2.74                 | (2.54-2.96) | <0.0001 | 1.24                    | (1.17-1.32) | <0.0001 |
| ≥60                                 | 2.85                 | (2.50-3.23) | <0.0001 | 0.65                    | (0.59-0.72) | <0.0001 |
| <b>Sex</b>                          |                      |             |         |                         |             |         |
| Female                              | 1.00                 |             |         | 1.00                    |             |         |
| Male                                | 6.78                 | (6.20-7.42) | <0.0001 | 7.17                    | (6.68-7.69) | <0.0001 |
| <b>Wealth</b>                       |                      |             |         |                         |             |         |
| Poorest                             | 1.00                 |             |         | 1.00                    |             |         |
| Poorer                              | 0.82                 | (0.73-0.91) | 0.0002  | 0.88                    | (0.81-0.96) | 0.0032  |
| Middle                              | 0.70                 | (0.62-0.79) | <0.0001 | 0.91                    | (0.83-1.00) | 0.0489  |
| Richer                              | 0.59                 | (0.51-0.67) | <0.0001 | 0.85                    | (0.77-0.93) | 0.0005  |
| Richest                             | 0.37                 | (0.32-0.42) | <0.0001 | 0.79                    | (0.71-0.87) | <0.0001 |
| <b>Setting</b>                      |                      |             |         |                         |             |         |
| Rural                               | 1.00                 |             |         | 1.00                    |             |         |
| Urban                               | 0.95                 | (0.83-1.07) | 0.3891  | 1.20                    | (1.11-1.30) | <0.0001 |

Abbreviation: OR odds ratio; CI confidence interval

<sup>a</sup>The perceived stress score ranged from 2-10 with higher scores corresponding to higher levels of perceived stress.

Models are adjusted for age, sex, wealth, setting, and country.

Country-income level was based on the World Bank classification in 2003.

Low-income countries include Burkina Faso, Bangladesh, Ivory Coast, Comoros, Ethiopia, Ghana, India, Kenya, Laos, Myanmar, Mauritania, Malawi, Nepal, Pakistan, Senegal, Chad, Vietnam, Zambia.

Middle-income countries include Bosnia and Herzegovina, China, Czech Republic, Dominican Republic, Estonia, Croatia, Kazakhstan, Sri Lanka, Latvia, Morocco, Mexico, Mauritius, Malaysia, Namibia, Philippines, Paraguay, Russia, Tunisia, Ukraine, Uruguay, South Africa.
